# Supplementary material for: Compound Heterozygous Variants in a Surviving Patient With Alkuraya-Kučinskas Syndrome: A New Case Report and a Review of the Literature
Source: Front Pediatr. 2022 Mar 4;10:806752. doi: 10.3389/fped.2022.806752 (PMC8931281; doi:10.3389/fped.2022.806752)
Supplement: Supplementary file 1 [file Table_1.XLSX]

## Sheet: all
Case. No	Individual	year	survival	variant type	development	variants	Cerebral Anomalies (Pre/Post-natal Images) and Pathological Findings	Head and Face	Eyes	Mouth	Joints	Limbs	Gastro_intestinal	Urogenital	Heart	Muscles	Behavior	Other Symptoms	reference
1	LT.II.1	male,13 yo	Y	compound heterozygote	severe, global developmental delay, no language, cannot stand or walk without support	c.3986A>C c.5599G>A	post-natal brain MRI: small posterior fossa arachnoid cyst, discrete vermian atrophy, slight increase of the fluid-filled retro and infra-cerebellar space and mild enlargement of subarachnoid spaces of frontal regions.	plagiocephaly	hypermetropia, strabismus, astigmatism	delayed eruption of permanent teeth	mild contractures of large joints	syndactyly of 2nd and 3rd toes, hands and feet paresis at birth, talipes valgus	normal	scrotum hypoplasia	none	muscle hypotonia, atrophy	stereotypic movements, spontaneous paroxysms of laughter	early-onset epilepsy	PMID: 29290337
2	LT.II.2	female,7 yo	Y	compound heterozygote	severe, global developmental delay, no language, cannot stand or walk without support	c.3986A>C c.5599G>A	post-natal brain MRI: discrete parenchymal rarefaction involving the frontal lobes	plagiocephaly	hypermetropia, strabismus, astigmatism	normal	mild contractures of large joints	paretic position of hands and feet in infancy, talipes valgus	chronic constipation	none	none	muscle hypotonia, atrophy	stereotypic movements	early onset epilepsy, dermatitis, psoriasis	PMID: 29290337
3	UK.II.1, DDD# 263241	female,11 yo	Y	compound heterozygote with one denovo missense mutation	global developmental delay, mild to moderate learning disability	c.4719G>A c.5873G>A	prenatal imaging (US and MRI): major microcephaly (HC -5 SD) with reduced white matter volume and mild ventriculomegaly	hypertelorism, slightly upslanting palpebral fissures	ocular motor apraxia, hypermetropia, strabismus	dental crowding, high palate	mild bilateral talipes managed by physiotherapy only; asymmetry of the thorax	syndactyly of 2nd and 3rd toes, 5th toe clinodacytly, hallux valgus	gastro_esophageal reflux	none	complex congenital heart disease (tetralogy of Fallot with pulmonary atresia)	none	poor concentration, immature behavior with minor self-harm (head_x005f_x0002_banging) when angry/ frustrated	none	PMID: 29290337
4	AL.II.1	male, termination of pregnancy at 21 weeks of amenorrhea	N	homozygous missense	NA	c.9149C>A	prenatal US findings: triventricular ventriculomegaly and corpus callosum agenesis; neuropathological findings: absence of cortical lamination and diffuse migration anomalies within a thin parenchymal mantle, ventriculomegaly, and voluminous germinal matrix. Corpus callosum was not identified. Infra-tentorial space: hypoplasia of the pons with absence of the longitudinal and transversal fibers an…	hypertelorism, posteriorly rotated ears	bilateral cataract with crystalline fibers of variable size and orientation	retrognathism, big horizontalized mouth	arthrogryposis (flexed deformity of shoulders, elbow and hips, and bilateral adductus thumbs)	bilateral equinovarus foot	choanal atresia	scrotum hypoplasia	pericardial effusion	not available	not applicable	slight pleural effusion, peritoneal effusion, dilatation of lymph vessels in lung with lympho_x005f_x0002_hematopoietic elements	PMID: 29290337
5	TU1.II.1	female, died at 3 days of age	N	homozygous missense	NA	c.10153G>C	prenatal imaging (US and MRI): cerebellar hypoplasia and brainstem dysgenesis (flat and elongated pons and slightly kinked brainstem with increased fluid filled retro-cerebellar spaces); severe parenchymal thinning with major lack of gyration (lissencephalic aspect) associated with voluminous germinal matrix protruding within moderate ventriculomegaly and absence of corpus callosum. Cephalic biom…	hypotelorism	none	deep palate	left club foot	long fifingers	none	none	left heart hypoplasia	not available	not applicable	none	PMID: 29290337
6	TU1.II.4	male, termination of pregnancy at 23 weeks	N	homozygous missense	NA	c.10153G>C	prenatal US findings: severe parenchymal thinning with lack of gyration associated with ventriculomegaly and corpus callosum agenesis. Neuropathological findings: complete corpus callosum agenesis, ventricular dilatation, severe cortical malformations with a reduced cortical plate, neuronal depletion, heterotopia within white matter, dysplasia of brainstem and cerebellum.	none	none	none	arthrogryposis (hip and shoulder contractures)	clenched hands, camptodactyly, club feet	none	none	none	not available	not applicable	none	PMID: 29290337
7	TU2.II.2	female, died at 12 days of age	N	homozygous missense	NA	c.10153G>C	prenatal imaging (US and MRI): cerebellar hypoplasia and dysgenesis associated to severe brainstem dysgenesis characterized by flat and elongated pons and slightly kinked brainstem with increased fluid filled retro-cerebellar spaces. Corpus callosum was not identified. Supratentorial anomalies include severe parenchymal thinning associated with lissencephalic aspect as well as voluminous germinal…	none	microphthalmia, blepharophimosis	none	club feet	club feet and hands	none	none	none	hypotonia	not applicable	narrow chest	PMID: 29290337
8	SA1.II.1, 13DG1900	female, death at 1 hr after delivery	N	homozygous nonsense	NA	c.1557T>A	prenatal US findings: severe ventriculomegaly with supratentorial cerebral mantle thinning associated with cerebellar hypoplasia	small eyes, low-set ears	small eyes	micrognathia	severe arthrogryposis (fixed elbows, fixed bilateral talipes, bilateral overlapping fingers, bilateral clinodactyly)	bilateral club foot	not available	not available	not available	not available	not applicable	pleural effusion	PMID: 29290337
9	SA2.II.1, 15DG0595	female, stillborn	N	homozygous splice	NA	c.11250-1G>A	prenatal US findings: hydrocephalus, absent corpus callosum, hypoplastic cerebellum	not available	not available	not available	arthrogryposis multiplex	bilateral overlapping fingers, bilateral cleft feet, bilateral cleft toes, and bilateral sandal gaps	normal	bilaterally abnormal kidneys	not available	not available	not applicable	skeletal shortening, nuchal thickening	PMID: 29290337
10	SA3.II.1, 15DG1933	female, stillborn	N	homozygous nonsense	NA	c.12067G>T	prenatal US findings: hydrocephalus, hypoplastic cerebellum	not available	not available	not available	arthrogryposis	bilateral talipes	normal	normal	absent fetal heart	not available	not applicable	skin edema	PMID: 29290337
11	US.II.3	male, termination of pregnancy at 19 weeks	N	compound heterozygote	NA	c.997dupA c.11567_12352delinsG	prenatal imaging (US and MRI): severe ventriculomegaly, thin cerebral parenchyma and cortical mantle associated with lissencephalic pattern, prominent germinal matrix, brain stem and vermian dysgenesis (kinked brain stem) and elongated pons; corpus callosum agenesis	low-set ears, webbed neck	normal	unremarkable	severe arthrogryposis with flexion contractures and pterygia, hyperflexed wrists, bilateral clinodactyly	bilateral talipes	normal	echogenic malrotated bowel without ascites, short penis with bulbous shaft	coarctation of the aorta	muscle atrophy	not applicable	low conus non-immune hydrops with scalp edema, cystic hygroma, anal atresia, bilateral pleural effusion	PMID: 29290337
12	SG.II.1	male, died at 3 months of age	N	compound heterozygote	NA	c.2902C>T c.3611delA	post-natal MRI: supratentorial findings include both severe parenchymal (or cerebral mantle) thinning and smooth cortical surface, germinolytic cysts involving voluminous germinal matrix protruding within severe ventriculomegaly without any identification of corpus callosum. Infratentorial findings include severe cerebellar hypoplasia with severe brain-stem dysgenesis characterized by a kinking a…	macrocephaly; hypertelorism; posteriorly rotated ears; flattened nasal bridge	congenital cataract; microphthalmia	no structural anomalies	arthrogryposis (involving bilateral shoulders, elbows, wrists, hands, knees)	bilateral structural congenital talipes equinovarus (CTEV)	ano-rectal malformation with recto_x005f_x0002_perianal fistula	no structural anomalies	small atrial septal defect/ patent foramen ovale	hypotonia	not applicable	excess skin folds of neck	PMID: 29290337
13	SG.II.4	male, died at 1 month of age	N	compound heterozygote	NA	c.2902C>T c.3611delA	post-natal MRI: supratentorial findings include both severe parenchymal (or cerebral mantle) thinning and smooth cortical surface, germinolytic cysts involving voluminous germinal matrix protruding within severe ventriculomegaly without any identification of corpus callosum. Infratentorial findings include severe cerebellar hypoplasia with severe brain-stem dysgenesis characterized by a kinking a…	macrocephaly; hypertelorism; bilateral low-set ears, short nose; anteverted nares	congenital cataracts; microphthalmia	no structural anomalies	arthrogryposis (involving bilateral elbows, wrists, hands, knees, hips)	bilateral structural congenital talipes equinovarus (CTEV)	normal	no structural anomalies	small to moderate fenestrated atrial septal defect	hypotonia	not applicable	webbed neck; inverted nipples	PMID: 29290337
14	F1.IV-1	Male, 38 yo	Y	homozygous missense	Mild developmental delay	c.2431A > G	not done	High arched palate, low set ears, prominent eyebrows, mild beaking of the nose	NA	NA	NA	NA	NA	NA	NA	NA	Delayed motor milestones, shy and uncooperative	NA	PMID: 32590954
15	F1.IV-2	Male, 31 yo	Y	homozygous missense	Mild developmental delay	c.2431A > G	not done	High arched palate	NA	NA	NA	NA	NA	NA	NA	NA	Delayed motor milestones	NA	PMID: 32590954
16	F1.IV-3	Male, 23 yo	Y	homozygous missense	Moderate developmental delay	c.2431A > G	not done	NA	NA	NA	NA	NA	NA	NA	NA	NA	Expressive speech delay, delayed motor milestones, social anxiety	NA	PMID: 32590954
17	F2.IV-2	Male, 24 yo	Y	homozygous missense	severe, global developmental delay	c.2431A > G	not avaliable	Malformed dentition, high arched palate, pointed ear on right side, long face, simian crease right hand, long thumb, small sub_x005f_x0002_mental region	NA	NA	NA	Cubitus valgus, high-arched foot, reduced muscle bulk	NA	NA	NA	NA	Delayed motor and language milestones, impulsive, irritable, short-tempered, stubborn, occasional head_x005f_x0002_banging, shy/ asocial	NA	PMID: 32590954
18	II.1;II.2;II.3	NA	N	compound heterozygote	NA	c.1932-3A>G c.2613+1G>A	bilateral ventriculomegaly, arthrogryposis (radial clubhand, bilateral clubfoot, flexed deformity of hip, knee and ankle joints), bilateral pyelectasis, increased thickness of the nuchal-fold, hypoplastic and low set ears, a defect of the interventricular septum was sus_x005f_x0002_pected	NA	NA	NA	NA	NA	NA	NA	NA	NA	NA	NA	PMID: 30485398
19		died on the ninth day after delivery	N	compound heterozygote	NA	c.359-1G>A c.14564_14565del	Severe hydrocephalus was detected by ultra_x005f_x0002_sound. The brain parenchyma showed absence of the normal gyral/sulcal pattern and a smooth appearance in keeping with lissencephaly. The corpus callosum was absent. The pons and cerebellum appeared hypoplastic with dilatation of the 4th ventricle and a Z-shaped appearance of the brain_x0002_stem	facial dysmorphic features, macrocephaly,	facial dysmorphic features, macrocephaly,	NA	NA	finger contractures on both hands and hypotonia	normal	NA	NA	Motor activity poor	NA	NA	PMID: 32657846
20		Male, 23 mo	Y	compound heterozygote	severe, global developmental delay	c.13123C>T; c.648T>G；c.683A>G	Brain malformation by prenatal ultrasound, fetal MRI documented underdevelopment of the brain stem and lack of normal gyria. Postnatal brain MRI demonstrated extensive cerebellar dysplasia, a hypoplastic midbrain, abnormal segmentation of the pons and medulla, extensive cortical dysplasia/polymicrogyria in the sylvian regions, severe hypogenesis of the corpus callosum, small abnormal lens, and hy…	NA	NA	NA	NA	NA	severe oropharyngeal dysphagia after a choking episode that led to aspiration, respiratory distress and apnea.	NA	hypsarrhythmia		NA	early-onset epilepsy	PMID: 30906834
21		Male, 12 mo	Y	compound heterozygote	severe, global developmental delay	c.13123C>T; c.648T>G；c.683A>G	Brain MRI demonstrated numerous developmental anomalies, including polymicrogyria, enlarged ventricles secondary to white matter volume loss, inferior vermin hypoplasia, pontine hypoplasia, congenital cataracts, and small optic nerves	NA	congenital cataracts	NA	NA	hypertonia	severe pharyngeal dysphagia	NA	NA	NA	NA	NA	PMID: 30906834
22		Male, 2 yo	Y	compound heterozygote	severe, global developmental delay	c.4892C>G c.10872dupA	Cranial MRI showed bilateral frontotemporal space was widened, the left ventricle was irregular, and the corpus callosum was short.	normal	normal	normal	normal	limb clonus	normal	normal	normal	normal	unstable walking, abnormal posture, foot valgus, poor balance ability	limb clonus	our study
